# Supplementary material
Source: Springer Nature journal article supplement (https://www.springermedizin.de/resource/supplementary/12885_2012_3383_MOESM3_ESM.pdf/9463698)

### A

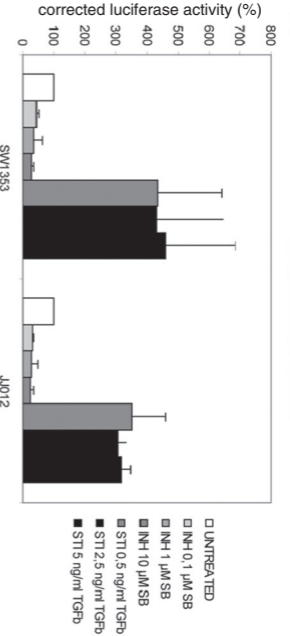

### B

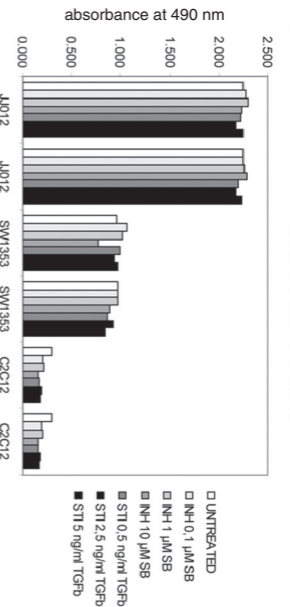

### C

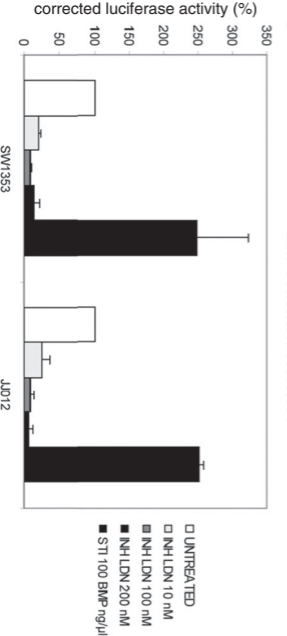

### D

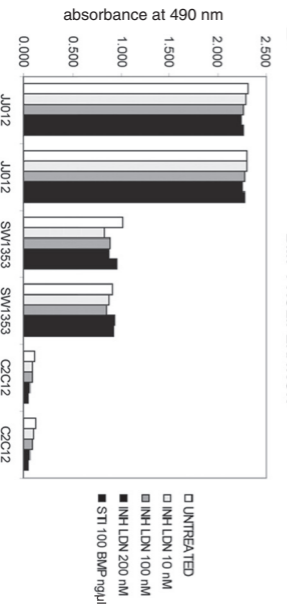

Supplement: MOESM3 [file 9463698]
